# Supplementary material
Source: PubMed Central journal article supplement (PMC4862713)
Supplement: IAI.01463-15_zii999091692so1.pdf [file IAI.01463-15_zii999091692so1.pdf]

**A**

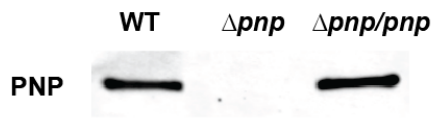

**B**

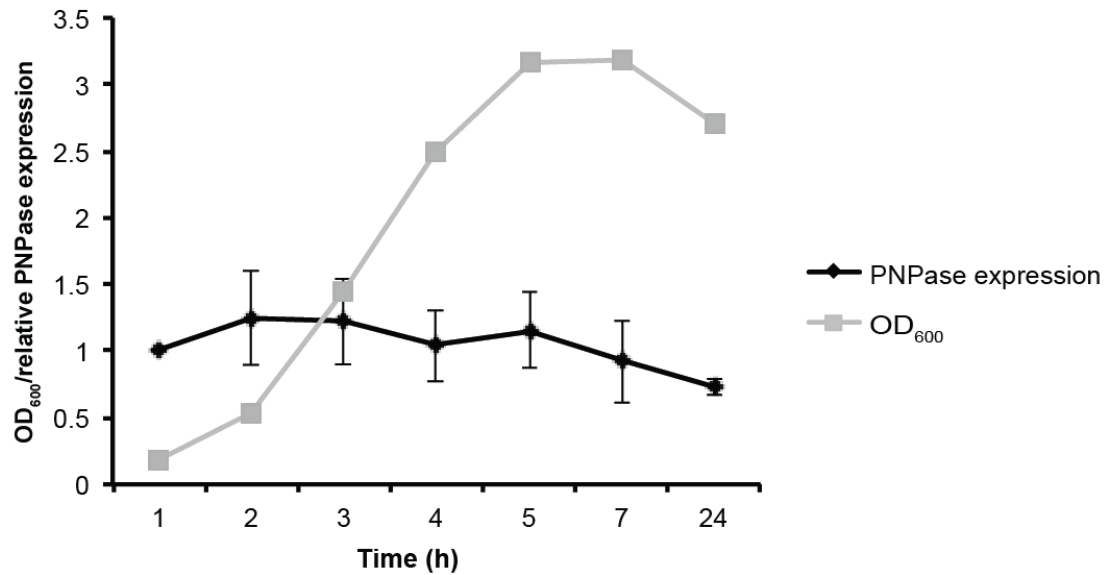

**Figure S1: PNPase expression during growth.**

A) PNPase immunoblot of wild-type,  $\Delta pnp$  and  $\Delta pnp/pnp$  bacteria. B)

Quantification of PNPase expression at different time points during the growth curve. FAM20 were grown in GC liquid/1% Kellogg's at 37°C in 5% CO<sub>2</sub> while shaking. Samples were collected at the indicated time points. The expression of EF-Tu was used as an internal control. The OD<sub>600</sub> values at these time points are also shown (gray squares). Note that the time scale is non-linear between the last two time points.

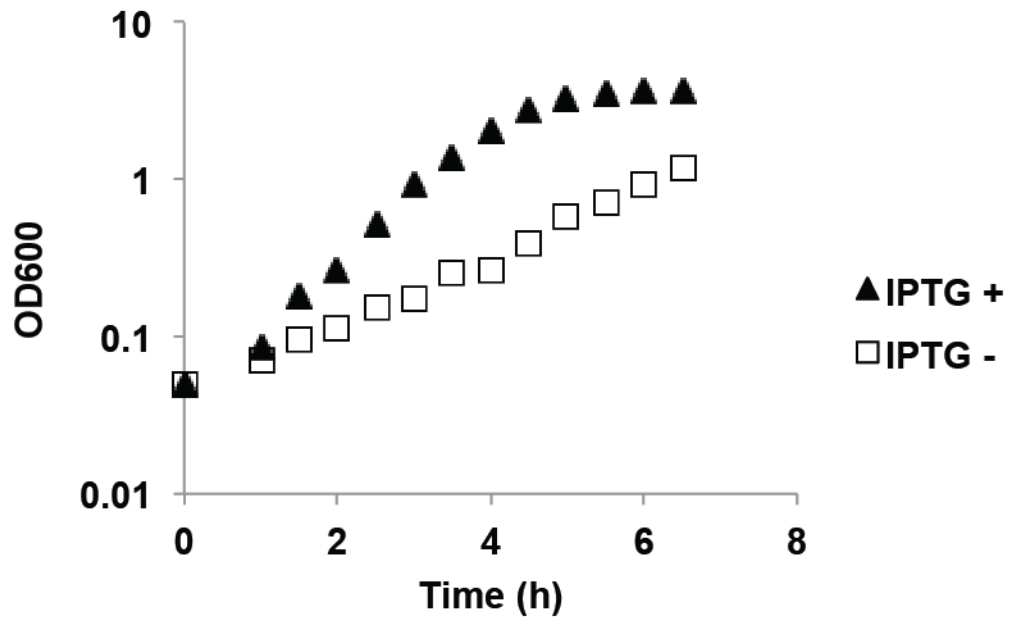

**Figure S2: The growth rate of  $\Delta pnp$ /PNPind is dependent on PNP induction.**

Wild-type FAM20 and the  $\Delta pnp$ /PNPind were inoculated to  $OD_{600} = 0.05$  and grown in GC supplemented with 1% Kellogg's solution at 37°C in 5%  $CO_2$  while shaking.

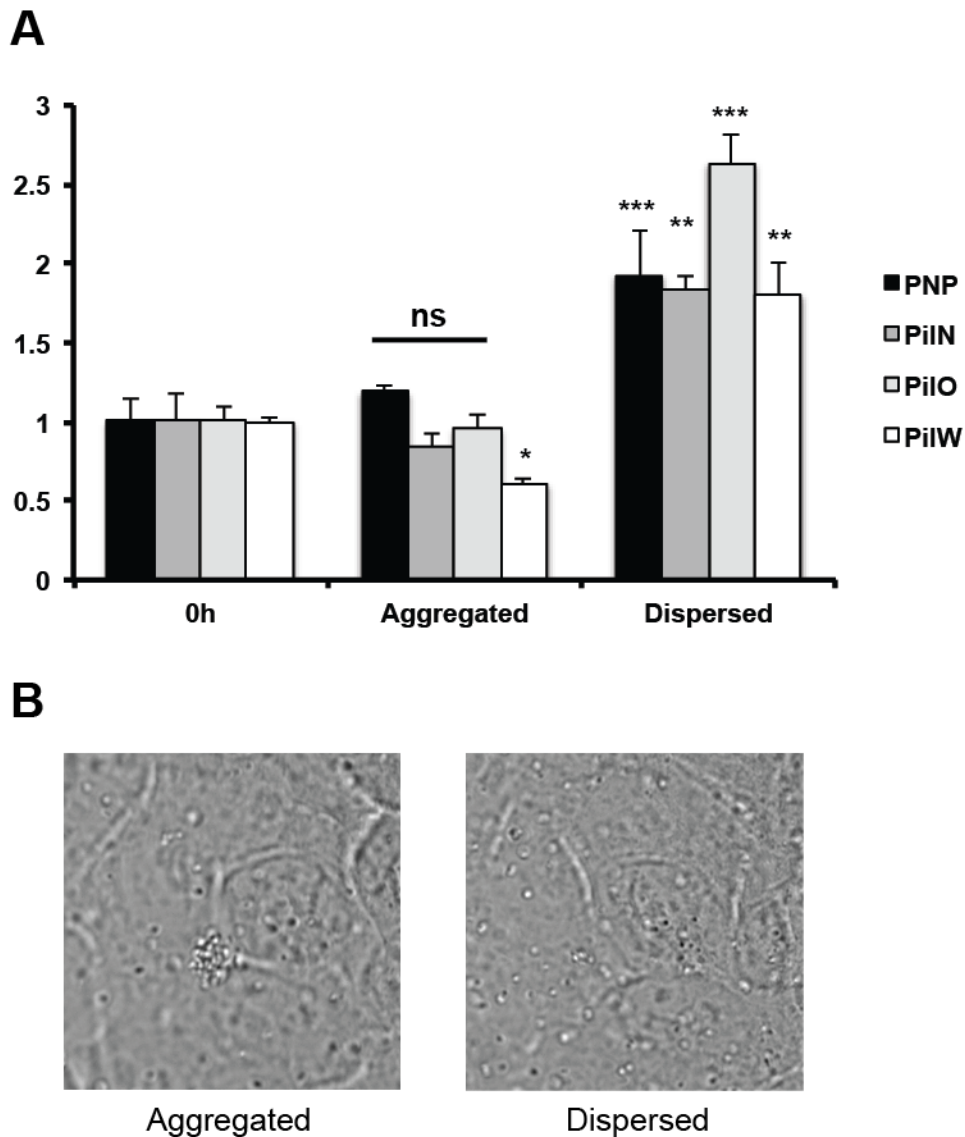

**Figure S3: Expression of PNPase and Pili genes during dispersal**

A) Expression of *pnp*, *pilN*, *pilO* and *pilW* in wild-type bacteria was measured at the mRNA level using qPCR. S10 expression was used as an internal control. The expression levels are normalized to the 0 h sample. The bacteria were grown in DMEM/1% FBS either to log phase while shaking, to log phase followed by infection of cells until aggregate formation or to log phase followed by infection of cells until aggregate dispersal. Statistical significance is indicated as follows: ns,  $P > 0.05$ ; \*,  $P < 0.05$ ; \*\*,  $P < 0.01$ ; \*\*\*,  $P < 0.001$  (ANOVA followed by

Bonferroni post hoc test). B) Representative pictures of aggregated and dispersed bacteria.

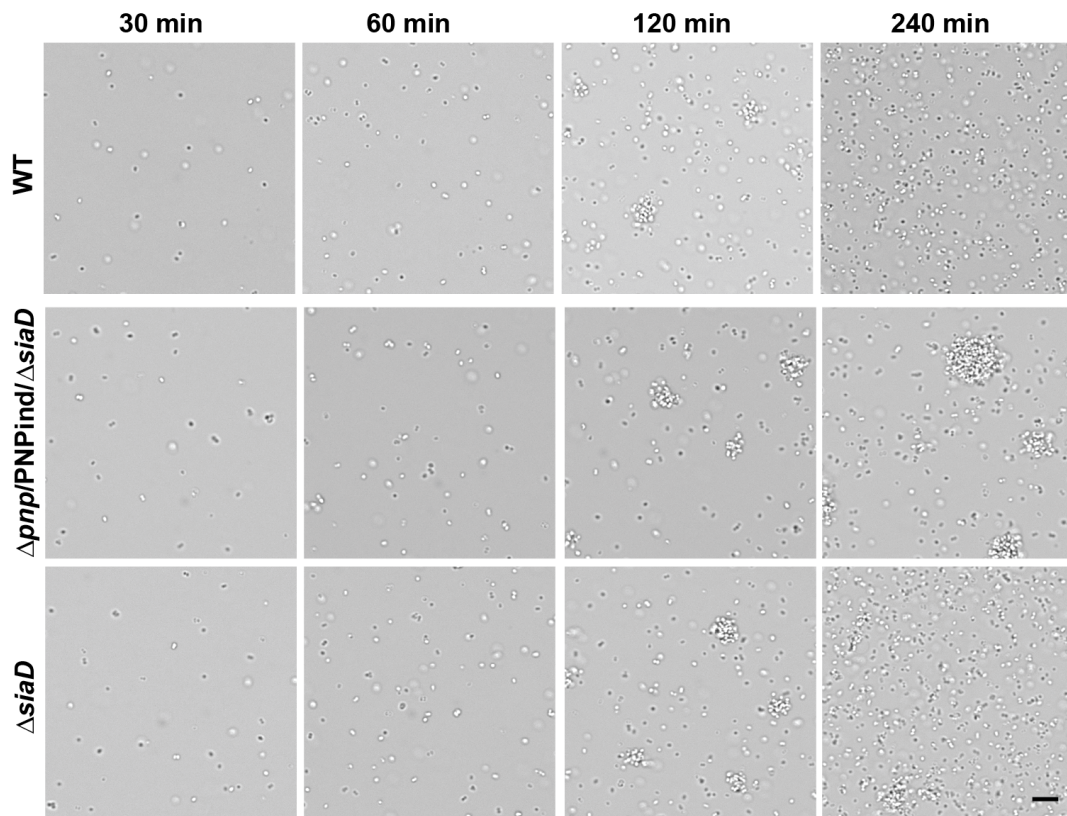

**Figure S4: Hyper-aggregation in the  $\Delta pnp$  mutant does not depend on the capsule.**

Time-lapse microscopy of wild-type,  $\Delta pnp/PNPind \Delta siaD$  and  $\Delta siaD$  bacteria. The bacteria were imaged after 30, 60, 120 and 240 minutes. The experiment was repeated twice using six technical replicates. Representative pictures are shown in the figure. The scale bar represents 10  $\mu\text{m}$ .

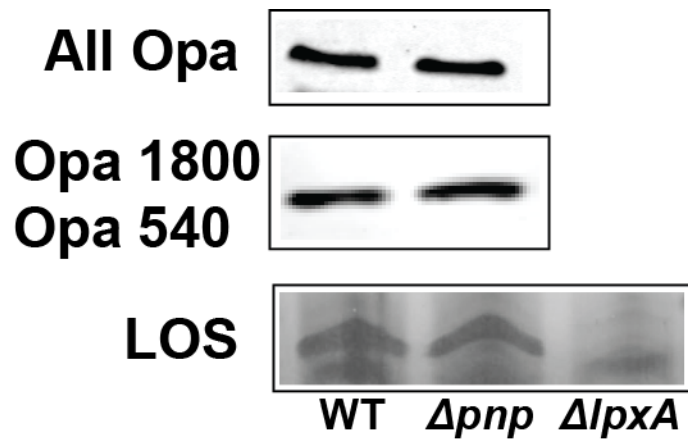

**Figure S5: Opa and LOS profiles are unchanged in the  $\Delta pnp$  mutant**

The expression of Opa proteins in wild-type and  $\Delta pnp$  bacteria as determined by immunoblot using 4B12/C11 (all Opa proteins) and H.22.1 (Opa 1800 + Opa 540). The LOS profile of the wild-type and the  $\Delta pnp$  bacteria. The LOS negative  $\Delta lpxA$  mutant was included as a negative control. The LOS was visualized by silver staining.

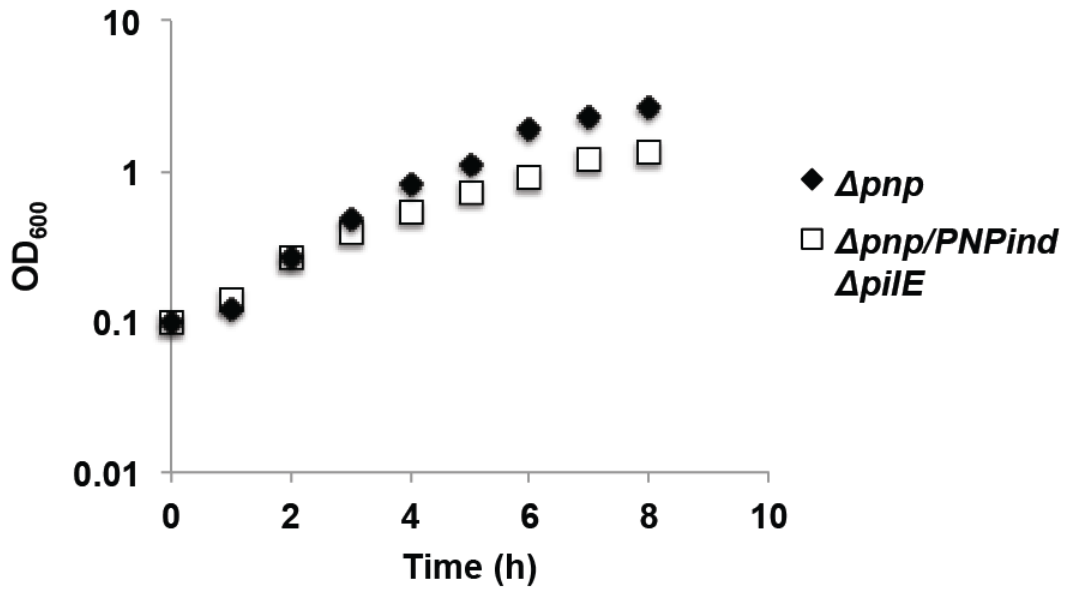

**Figure S6: The growth defect of  $\Delta pnp$  is not caused by aggregation**

The  $\Delta pnp$  mutant and the  $\Delta pnp/PNPind \Delta pile$  double mutant were inoculated to OD<sub>600</sub> = 0.1 and grown in GC supplemented with 1% Kellogg's solution and without IPTG at 37°C in 5% CO<sub>2</sub> while shaking.

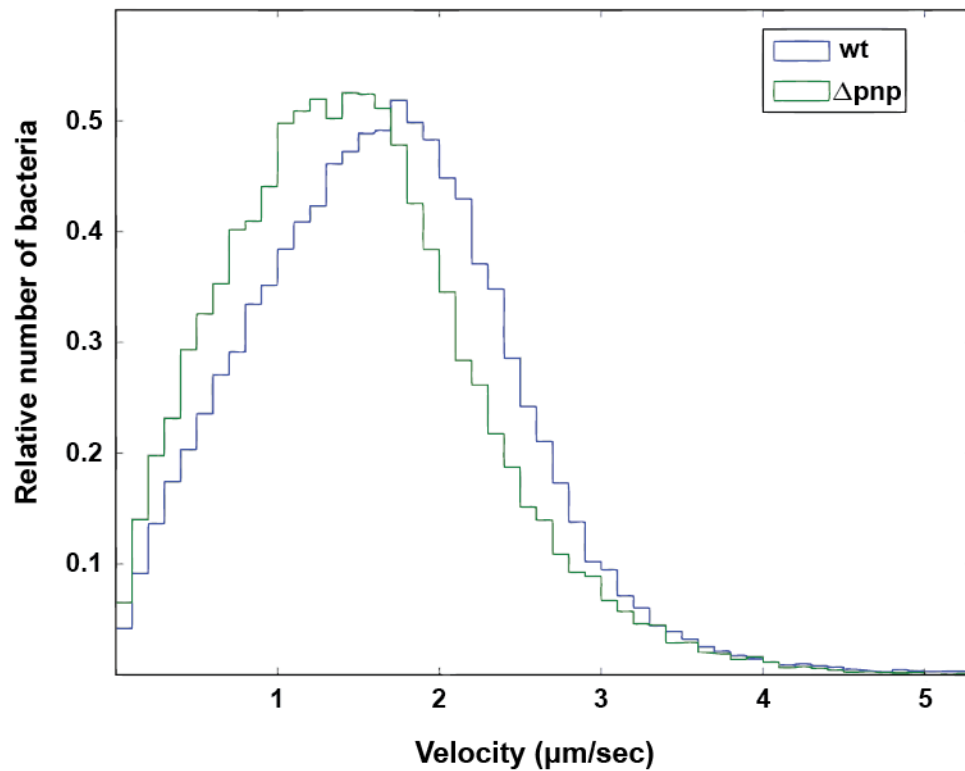

**Figure S7: The  $\Delta pnp$  mutant is motile.**

Wild-type and  $\Delta pnp$  bacteria were incubated in GC 10% Kellogg's at 37°C in 5% CO<sub>2</sub> in 35 mm poly-D-lysine-coated glass-bottom dishes (MatTek). Single bacteria were tracked using time-lapse microscopy. The velocity distributions of  $n = 37$  individual 60 s tracks per strain are shown. Velocity (μm/sec) is plotted against the relative number of bacteria.
